# Supplementary material for: Detection of Germline Variants in 450 Breast/Ovarian Cancer Families with a Multi-Gene Panel Including Coding and Regulatory Regions
Source: MDPI journal article supplement (doi:10.3390/ijms22147693), 2021-07-19
Supplement: s1 [file s1]

| Gene | Nt.Change | Function   | Clinical Classification | Position | N.Patient | PolyPhen2(HumDiv) | PROVEAN              | Database | dbSNP       |
|------|-----------|------------|-------------------------|----------|-----------|-------------------|----------------------|----------|-------------|
| ATM  | c.1810C>T | Missense   | Likely Benign           | exon 12  | 2         | POSSIBLY DAMAGING | Neutral (-2.165)     | LOVD     | rs2227922   |
| ATM  | c.6067G>A | Missense   | Pathogenic              | exon 41  | 1         | PROBABLY DAMAGING | Deleterious (-3.494) | LOVD     | rs11212587  |
| ATM  | c.998C>T  | Missense   | Uncertain Significance  | exon 8   | 1         | POSSIBLY DAMAGING | Neutral (-1.592)     | LOVD     | rs28904919  |
| ATM  | c.2254C>G | Missense   | Uncertain Significance  | exon 15  | 1         | PROBABLY DAMAGING | Neutral (-1.168)     |          | rs756522395 |
| ATM  | c.5611A>C | Missense   | Uncertain Significance  | exon 37  | 1         | PROBABLY DAMAGING | Neutral (-2.327)     |          | rs990967899 |
| ATM  | c.4060C>A | Missense   | Uncertain Significance  | exon 27  | 2         | BENIGN            | Neutral (-2.013)     | LOVD     | rs145119475 |
| ATM  | c.4703A>G | Missense   | Uncertain Significance  | exon 31  | 1         | BENIGN            | Neutral (-1.432)     | LOVD     | rs368830730 |
| ATM  | c.6293T>C | Missense   | Likely Pathogenic       | exon 43  | 1         | PROBABLY DAMAGING | Deleterious (-3.669) | MGeND    | rs587780631 |
| ATM  | c.9023G>A | Missense   | Pathogenic              | exon 63  | 1         | PROBABLY DAMAGING | Deleterious (-4.004) | LOVD     | rs587781894 |
| ATM  | c.2317A>G | Missense   | Uncertain Significance  | exon 15  | 1         | BENIGN            | Neutral (-0.365)     |          |             |
| ATM  | c.7778A>G | Missense   | Uncertain Significance  | exon 52  | 1         | BENIGN            | Neutral (-1.424)     | MGeND    | rs587779867 |
| ATM  | c.5558A>T | Missense   | Likely Benign           | Exon 37  | 1         | POSSIBLY DAMAGING | Deleterious (-4.519) | LOVD     | rs1801673   |
| ATM  | c.2572T>C | Missense   | Likely Benign           | exon 17  | 1         | POSSIBLY DAMAGING | Deleterious (-2.574) | LOVD     | rs1800056   |
| ATM  | c.1960C>A | Missense   | Uncertain Significance  | exon 13  | 1         | BENIGN            | Neutral (-0.406)     | LOVD     | rs528165789 |
| ATM  | c.2119T>C | Missense   | Likely Benign           | exon 13  | 2         | BENIGN            | Neutral (-0.383)     | LOVD     | rs4986761   |
| ATM  | c.1272T>C | Synonymous | Uncertain Significance  | exon 10  | 1         |                   | Neutral (0)          | LOVD     | rs35578748  |

|     |                    |            |                        |         |   |                   |                    |               |              |
|-----|--------------------|------------|------------------------|---------|---|-------------------|--------------------|---------------|--------------|
| ATM | c.3894dupT         | Frameshift | Pathogenic             | exon 26 | 3 |                   |                    | ClinVar Miner | rs587781823  |
| ATM | c.7382G>A          | Missense   | Likely Pathogenic      | exon 50 | 1 | PROBABLY DAMAGING | Neutral -1748      | LOVD          | rs768461085  |
| ATM | c.1601 C>G         | Missense   | Uncertain Significance | exon 10 | 2 | PROBABLY DAMAGING | Deleterious -4.338 | LOVD          | rs587782212  |
| ATM | c.7456C>T          | Nonsense   | Pathogenic             | exon 50 | 1 |                   |                    | LOVD          | rs587779865  |
| ATM | c.2945G>A          | Missense   | Uncertain Significance | exon 20 | 1 | POSSIBLY DAMAGING | Neutral -1.741     |               | rs749471737  |
| ATM | c.1516G>T          | Missense   | Uncertain Significance | exon 10 | 1 | POSSIBLY DAMAGING | Neutral -2.030     | LOVD          | rs587779816  |
| ATM | c.1700A>G          | Missense   | Uncertain Significance | exon 11 | 1 | BENIGN            | Neutral -0.861     |               | rs786203230  |
| ATM | c.1595G>A          | Missense   | Uncertain Significance | exon 10 | 1 | PROBABLY DAMAGING | Deleterious -3839  | LOVD          | rs35963548   |
| ATM | c.5897G>A          | Missense   | Uncertain Significance | exon 39 | 1 | BENIGN            | Neutral 0.133      | ClinVar Miner | rs1555110520 |
| ATM | c.8122G>A          | Missense   | Pathogenic             | exon 55 | 1 | PROBABLY DAMAGING | Deleterious -4.148 | LOVD          | rs587782719  |
| ATM | c.7269A>T          | Missense   | Likely Pathogenic      | exon 49 | 1 | PROBABLY DAMAGING | Neutral -1.250     |               | rs864622471  |
| ATM | c.8083G>A          | Missense   | Likely Pathogenic      | exon 55 | 1 | PROBABLY DAMAGING | Deleterious -5177  | LOVD          | rs1555127166 |
| ATM | c.8368delA         | Frameshift | Pathogenic             | exon 57 | 1 |                   |                    |               |              |
| ATM | c.6703A>G          | Missense   | Uncertain Significance | exon 46 | 1 | BENIGN            | Neutral -0.351     |               | rs768791795  |
| ATM | c.146C>T           | Missense   | Uncertain Significance | exon 3  | 1 | POSSIBLY DAMAGING | Neutral -2.073     | LOVD          | rs1800054    |
| ATM | c.8734A>G          | Missense   | Likely Pathogenic      | exon 60 | 1 | PROBABLY DAMAGING | Deleterious -5833  | LOVD          | rs376676328  |
| ATM | c.3284G>A          | Missense   | Likely Pathogenic      | exon 22 | 1 | POSSIBLY DAMAGING | Neutral -0.238     | LOVD          | rs587781815  |
| ATM | c.7671_7674delGTTT | Frameshift | Pathogenic             | exon 52 | 1 |                   |                    |               | rs1555124506 |

|       |                    |            |                        |         |   |                   |                      |               |              |
|-------|--------------------|------------|------------------------|---------|---|-------------------|----------------------|---------------|--------------|
| ATM   | c.6226A>G          | Missense   | Uncertain Significance | exon 43 | 1 | POSSIBLY DAMAGING | Neutral (-0.285)     |               | rs755973863  |
| ATM   | c.7475T>G          | Missense   | Likely Pathogenic      | exon 50 | 1 | PROBABLY DAMAGING | Deleterious (-4.533) | LOVD          | rs56399857   |
| BRIP1 | c.2392C>T          | Nonsense   | Pathogenic             | exon 17 | 1 |                   |                      | LOVD          | rs137852986  |
| BRIP1 | c.139C>G           | Missense   | Pathogenic             | exon 3  | 2 | PROBABLY DAMAGING | Deleterious (-6.458) | LOVD          | rs28903098   |
| BRIP1 | c.2448G>T          | Missense   | Uncertain Significance | exon 17 | 1 | PROBABLY DAMAGING | Deleterious (-12.28) |               | rs1064795352 |
| BRIP1 | c.316C>T           | Missense   | Uncertain Significance | exon 4  | 1 | BENIGN            | Neutral (-0.36)      | MGeND         | rs587780247  |
| BRIP1 | c.2220G>T          | Missense   | Likely Benign          | exon 15 | 1 | PROBABLY DAMAGING | Neutral (-2.20)      | LOVD          | rs45589637   |
| BRIP1 | c.2325T>G          | Missense   | Uncertain Significance | exon 16 | 1 | PROBABLY DAMAGING | Deleterious (-4.45)  |               | rs375146450  |
| BRIP1 | c.3029A>G          | Missense   | Uncertain Significance | exon 20 | 1 | BENIGN            | Neutral (-0.32)      |               |              |
| BRIP1 | c.2237_2240delTCAA | Frameshift | Pathogenic             | exon 15 | 1 |                   |                      | MGeND         | rs587782726  |
| BRIP1 | c.1201_1204dupTGTG | Frameshift | Pathogenic             | exon 9  | 2 |                   |                      |               | rs730881647  |
| BRIP1 | c.582A>T           | Missense   | Uncertain Significance | exon 6  | 1 | PROBABLY DAMAGING | Neutral (-1.05)      |               | rs796681126  |
| BRIP1 | c.2992_2995delAAGA | Frameshift | Pathogenic             | exon 20 | 1 |                   |                      |               | rs786203717  |
| CDH1  | c.2074G>A          | Missense   | Likely Benign          | exon 13 | 1 | POSSIBLY DAMAGING | Neutral (-0.776)     | ClinVar Miner | rs376854556  |
| CDH1  | c.2413G>A          | Missense   | Likely Benign          | exon 15 | 1 | PROBABLY DAMAGING | Deleterious (-2.633) | LOVD          | rs200894246  |
| CDH1  | c.674T>C           | Missense   | Uncertain Significance | exon 5  | 3 | PROBABLY DAMAGING | Deleterious (-2.67)  | MGeND         | rs786203207  |
| CDH1  | c.131G>T           | Missense   | Likely Benign          | exon 2  | 1 | BENIGN            | Neutral (-1.88)      |               | rs1375178645 |
| CDH1  | c.2623A>G          | Missense   | Uncertain Significance | exon 16 | 1 | POSSIBLY DAMAGING | Deleterious (-2.84)  |               | rs1555518287 |
| CHEK2 | c.1312G>T          | Missense   | Likely Pathogenic      | exon 13 | 1 | PROBABLY DAMAGING | Deleterious (-4.888) | LOVD          | rs587780170  |

|       |                  |                  |                        |         |   |                   |                         |               |             |
|-------|------------------|------------------|------------------------|---------|---|-------------------|-------------------------|---------------|-------------|
| CHEK2 | c.483_485delAGA  | Inframe deletion | Likely Pathogenic      | exon 4  | 1 |                   | Deleterious(-10.48)     | MGeND         | rs587782008 |
| CHEK2 | c.507delT        | Frameshift       | Likely Pathogenic      | exon 4  | 1 |                   |                         |               |             |
| CHEK2 | c.1441G>T        | Missense         | Uncertain Significance | exon 13 | 1 | PROBABLY DAMAGING | Deleterious (-5.15)     | LOVD          | rs200050883 |
| CHEK2 | c.917G>C         | Missense         | Likely Pathogenic      | exon 10 | 1 | PROBABLY DAMAGING | Deleterious (-5.38)     | LOVD          | rs587780192 |
| CHEK2 | c.1430delC       | Frameshift       | Likely Pathogenic      | exon 13 | 1 |                   |                         |               |             |
| CHEK2 | c.132C>T         | Synonymous       | Likely Benign          | exon 2  | 2 |                   | Neutral (0.00)          | ClinVar Miner | rs199715101 |
| CHEK2 | c.409C>T         | Nonsense         | Pathogenic             | exon 3  | 1 |                   |                         | LOVD          | rs730881701 |
| CHEK2 | c.1118A>G        | Missense         | Likely Pathogenic      | exon 9  | 1 | PROBABLY DAMAGING | Deleterious (-3.74)     |               | rs894075046 |
| CHEK2 | c.911T>C         | Missense         | Likely Pathogenic      | exon 9  | 1 | PROBABLY DAMAGING | Deleterious (-3.58)     |               | rs587782033 |
| NBN   | c.671G>A         | Missense         | Uncertain Significance | exon 6  | 1 | POSSIBLY DAMAGING | Deleterious (-4.8)      |               | rs199845467 |
| NBN   | c.643C>T         | Missense         | Uncertain Significance | exon 6  | 1 | PROBABLY DAMAGING | Deleterious (-4.100)    | LOVD          | rs34767364  |
| NBN   | c.511A>G         | Missense         | Uncertain Significance | exon 5  | 1 | PROBABLY DAMAGING | Neutral (-0.795)        | LOVD          | rs61754966  |
| PALB2 | c.1451T>A        | Nonsense         | Pathogenic             | exon 4  | 1 |                   | Deleterious (-1642.549) | ClinVar Miner | rs786203714 |
| PALB2 | c.2506G>A        | Missense         | Uncertain Significance | exon 5  | 1 | BENIGN            | Neutral (-0.37)         | LOVD          | rs536644825 |
| PALB2 | c.2920_2921delAA | Frameshift       | Pathogenic             | exon 9  | 1 |                   |                         |               | rs180177126 |
| PALB2 | c.2066C>T        | Missense         | Uncertain Significance | exon 5  | 1 | BENIGN            | Neutral (1.37)          | LOVD          | rs749602688 |
| PALB2 | c.1463G>C        | Missense         | Uncertain Significance | exon 4  | 1 | BENIGN            | Neutral (-1.52)         | ClinVar Miner | rs76792659  |
| PALB2 | c.1565dupC       | Frameshift       | Likely Pathogenic      | exon 4  | 1 |                   |                         |               |             |

|        |                |                   |                        |        |   |                   |                      |                      |             |
|--------|----------------|-------------------|------------------------|--------|---|-------------------|----------------------|----------------------|-------------|
| PTEN   | c.350A>G       | Missense          | Uncertain Significance | exon 5 | 1 | BENIGN            | Neutral (-1.199)     | LOVD                 | rs551221430 |
| PTEN   | c.17_18insGCG  | Inframe Insertion | Uncertain Significance | exon 1 | 1 |                   | Neutral (0.00)       |                      |             |
| RAD50  | c.980G>A       | Missense          | Likely Benign          | exon 7 | 1 | PROBABLY DAMAGING | Neutral (-2.052)     | LOVD                 | rs28903091  |
| RAD50  | c.1094G>A      | Missense          | Uncertain Significance | exon 8 | 1 | BENIGN            | Neutral (-0.171)     | ClinVar Miner, MGenD | rs146370443 |
| RAD50  | c.1277A>G      | Missense          | Uncertain Significance | exon 9 | 1 | PROBABLY DAMAGING | Deleterious (-2.772) | ClinVar Mider        | rs145428112 |
| RAD50  | c.379G>A       | Missense          | Likely Benign          | exon 4 | 1 | PROBABLY DAMAGING | Neutral (-0.818)     | LOVD                 | rs28903086  |
| RAD51C | c.376G>A       | Missense          | Likely Benign          | exon 2 | 1 | BENIGN            | Neutral (-1.771)     | LOVD                 | rs61758784  |
| RAD51C | c.414G>C       | Missense          | Pathogenic             | exon 3 | 1 | POSSIBLY DAMAGING | Deleterious (-3.6)   | LOVD                 | rs267606999 |
| RAD51C | c.397_398delCA | Frameshift        | Pathogenic             | exon 2 | 1 |                   |                      |                      |             |
| RAD51D | c.26G>C        | Missense          | Likely Pathogenic      | exon 1 | 1 | POSSIBLY DAMAGING | Deleterious (-6.191) | LOVD                 | rs140825795 |
| RAD51D | c.167T>G       | Missense          | Likely Benign          | exon 2 | 1 | POSSIBLY DAMAGING | Deleterious (-2.976) |                      | rs745307359 |
| RAD51D | c.252T>C       | Synonymous        | Likely Benign          | exon 4 | 1 |                   | Neutral (0.00)       |                      |             |
| RAD51D | c.735C>A       | Synonymous        | Likely Benign          | exon 8 | 1 |                   | Neutral (0.00)       |                      | rs760789270 |
| RAD51D | c.694C>T       | Nonsense          | Pathogenic             | exon 8 | 1 |                   |                      | LOVD                 | rs587780104 |
| STK11  | c.1211C>T      | Missense          | Likely Benign          | exon 9 | 1 | BENIGN            | Neutral (-1.747)     | LOVD                 | rs200078204 |
| STK11  | c.1273C>A      | Missense          | Uncertain Significance | exon 9 | 1 | POSSIBLY DAMAGING | Neutral (-1.35)      | LOVD                 | rs754853898 |
| TP53   | c.817C>G       | Missense          | Pathogenic             | exon 8 | 1 | PROBABLY DAMAGING | Deleterious (-6.693) | LOVD, IARC           | rs121913343 |

**Table S1: List of 89 coding variants identified in 450 of patients.** The table reports the nucleotide change for each variant, their clinical classification (P = Pathogenic, LP = Likely-pathogenic, VUS = Variant of Unknown clinical Significance, LB = Likely-benign), their frequency identified in these patients, the predictive analysis on the effect of amino acid change on the protein function obtained by *Polyphen2* and *PROVEAN* software(cutoff=-2.5), whether the variants have been previously recorded in databases and their dbSNP code.

a)

| Gene  | Nt.change  | Clinical Classification | Position | N.Patient | Database           | Transcription factor                                                                                         | rVarBase/ENCODE                                                                                         | dbSNP       |
|-------|------------|-------------------------|----------|-----------|--------------------|--------------------------------------------------------------------------------------------------------------|---------------------------------------------------------------------------------------------------------|-------------|
| ATM   | c.-24A>C   | Uncertain Significance  | 5'UTR    | 1         |                    | GRE, GFI1, GATA1/2, OCT1, CREB, PADS, USF(Tfbind)                                                            | TF binding region<br>Chromatin interaction                                                              |             |
| BRCA1 | c.-676 T>A | Uncertain Significance  | 5' UTR   | 1         | BRCA exchange/LOVD | CEBP, Elk-1, NF-AT1, STAT4, HMG, STAT1 beta, UNC-86, STAT5a, AGL3, IRF-3, Pax4a, POU3F2(Promo), CREL(Tfbind) | Bivalent/Poised TSS, TF binding region                                                                  | rs8176072   |
| BRCA1 | c.-408T>A  | Uncertain Significance  | 5' UTR   | 1         | BRCA exchange/LOVD | CHOP, CEBPB, OCT1, HLF (Tfbind)                                                                              | TF binding region,Chromatin interaction, lncRNA<br>Bivalent/Poised<br>Active TSS<br>Flanking Active TSS |             |
| BRCA2 | c.-1193C>T | Uncertain Significance  | 5'UTR    | 1         | BRCAexchange/LOVD  | NRF2, GATA1/2, USF, T3R, Myod (Tfbind)                                                                       | TF binding region<br>Chromatin interaction                                                              |             |
| CDH1  | c.-54 G>C  | Benign                  | 5'UTR    | 1         | LOVD               | CAP, SP1, CP2 (Tfbind)                                                                                       | Chromatin interactive region                                                                            | rs5030874   |
| CDH1  | c.-44G>A   | Uncertain Significance  | 5'UTR    | 1         |                    | SP1, AP2, CREB(Tfbind)                                                                                       | TF binding region<br>Chromatin interaction                                                              | rs886041159 |
| PALB2 | c.-138G>C  | Uncertain Significance  | 5' UTR   | 1         |                    | ELK1, CETS1 (Promo,Tfbind), CAP, NRF2 (Tfbind), STAT4 (PROMO), pu.1 (Lasagna )                               | TF binding region,<br>Chromatin interactive region, Bivalent/Poised TSS                                 | rs552824227 |

|        |            |                        |       |   |  |                                                                                                  |                                                                                                             |             |
|--------|------------|------------------------|-------|---|--|--------------------------------------------------------------------------------------------------|-------------------------------------------------------------------------------------------------------------|-------------|
| PTEN   | c.-944C>T  | Uncertain Significance | 5'UTR | 1 |  | ZF5, EF2(Promo), WT1-KT5(Lasagna), AP4, AP2, SP1, EGR1, GC (Tfbind)                              | Bivalent/Poised TSS, TF binding region, Chromatin interaction                                               |             |
| PTEN   | c.-102A>C  | Uncertain Significance | 5'UTR | 1 |  | CAP (Tfbind)                                                                                     | TF binding region;CpG island;Chromatin interaction,Bivalent/Poised TSS<br>ZNF genes & repeats<br>Active TSS |             |
| PTEN   | c.-1027C>A | Uncertain Significance | 5'UTR | 1 |  | SP1, AP2, MZF1 (Tfbind)                                                                          | TF binding region, CpG island, Chromatin interactive region, Enhancers, Bivalent/Poised TSS                 |             |
| PTEN   | c.-323C>T  | Uncertain Significance | 5'UTR | 1 |  | VMYB, ZIP (Tfbind)                                                                               | TF binding region, CpG island, Chromatin interactive region, Enhancers, Bivalent/Poised TSS                 |             |
| RAD51C | c.-15G>A   | Uncertain Significance | 5'UTR | 1 |  | T3R-beta1, RXR-alpha, USF(Tfbind)                                                                |                                                                                                             |             |
| RAD51C | c.-395T>G  | Uncertain Significance | 5'UTR | 1 |  | OCT1, CDPCR1, CDPCR3HD, NKX25 (Tfbind), GR-beta (Promo)                                          | TF binding region, CpG island, Chromatin interactive region                                                 | rs568361156 |
| RAD51C | c.-1G>A    | Uncertain Significance | 5'UTR | 1 |  | PAX5, AP4, OCT1(Tfbind)                                                                          | TF binding region<br>CpG island<br>Chromatin interaction                                                    | rs750045091 |
| RAD51D | c.-116C>T  | Uncertain Significance | 5'UTR | 1 |  | HNF4, ARP1, COUP, AP2, VMYB(Tfbind), NF1(Tfbind, Promo), p53 (Promo), COUP TF2 (Lasagna, Tfbind) | TF binding region, Chromatin interactive region                                                             |             |
| RAD51D | c.-239C>T  | Likely Benign          | 5'UTR | 1 |  | ELK1, NRF2, AP4 (Tfbind), GCF, E2F1 (Promo), c-Myb(L)                                            | TF binding region, Chromatin interactive region, Bivalent/Poised TSS                                        | rs550346401 |

|       |           |                        |       |   |  |                                  |                                                 |             |
|-------|-----------|------------------------|-------|---|--|----------------------------------|-------------------------------------------------|-------------|
| STK11 | c.-636C>T | Uncertain Significance | 5'UTR | 1 |  | STAT3, CREB, NFKB50, SP1(Tfbind) |                                                 | rs981125953 |
| STK11 | c.-127T>C | Benign                 | 5'UTR | 1 |  | Pax5, Solf1, AP2, E2 (Tfbind)    | TF binding region, Chromatin interactive region | rs532196225 |

b)

| Gene  | Nt.change  | Clinical Classification | Position | N.Patient | Database     | rVarBase/ENCODE              | TargetScanHuman/miRDB                                         | dbSNP        |
|-------|------------|-------------------------|----------|-----------|--------------|------------------------------|---------------------------------------------------------------|--------------|
| ATM   | c.*2842A>G | Uncertain Significance  | 3'UTR    | 1         |              | Enhancers, Genic enhancers   | hsa-miR-7159-3p, hsa-miR-2117 (miRDB), hsa-miR-4328 (TSH)     | rs186644530  |
| ATM   | c.*636A>G  | Uncertain Significance  | 3'UTR    | 1         |              | Chromatin interaction        | hsa-miR-802 , hsa-miR-196a-1-3p (miRDB) hsa-miR-4704-5p (TSH) | rs1024163177 |
| ATM   | c.*26A>G   | Uncertain Significance  | 3'UTR    | 1         |              | Chromatin interaction        | hsa-miR-5681a, hsa-miR-488-3p (miRDB- TSH)                    | rs1247328981 |
| ATM   | c.*537A>C  | Uncertain Significance  | 3'UTR    | 1         |              | Chromatin interaction        |                                                               | rs910689990  |
| ATM   | c.*811T>G  | Uncertain Significance  | 3'UTR    | 1         |              | Chromatin interaction        | hsa-miR-3185(TSH)                                             | rs748879858  |
| BRCA1 | c.*750A>G  | Likely Benign           | 3'UTR    | 2         | BRCAexchange | Enhancers                    |                                                               | rs138782023  |
| NBN   | c.*724dupT | Uncertain Significance  | 3'UTR    | 1         |              | Chromatin interactive region |                                                               | rs564878448  |
| PTEN  | c.*353C>T  | Benign                  | 3' UTR   | 1         | MGeND        |                              | hsa-miR-542-3p (seed region, TSH, miRDB)                      | rs181234898  |



|        |                      |                        |        |   |               |                                                                  |                                                                                             |              |
|--------|----------------------|------------------------|--------|---|---------------|------------------------------------------------------------------|---------------------------------------------------------------------------------------------|--------------|
| PTEN   | c.*1122_*1123insT    | Uncertain Significance | 3' UTR | 1 |               | TF binding region, Chromatin interaction                         |                                                                                             |              |
| PTEN   | c.*4394T>A           | Benign                 | 3'UTR  | 1 |               |                                                                  | miR-499a-5p (TSH)                                                                           | rs527703056  |
| PTEN   | c.*923T>A            | Uncertain Significance | 3'UTR  | 1 |               | TF binding region<br>Chromatin interaction<br>miRNA targets site | miR-193-3p (TSH)                                                                            | rs1217913921 |
| PTEN   | c.*1152C>T           | Benign                 | 3'UTR  | 1 |               | miRNA target site                                                |                                                                                             | rs552354954  |
| PTEN   | c.*2985_*2986delGT   | Uncertain Significance | 3'UTR  | 1 |               | TF binding region<br>Chromatin interactive region                |                                                                                             |              |
| PTEN   | c.*4606_*4609delGCTT | Benign                 | 3'UTR  | 1 |               | Chromatin interaction                                            | hsa-miR-616-5p,<br>hsa-miR-373-5p,<br>hsa-miR-371b-5p(miRDB)                                | rs754321761  |
| RAD50  | c.*1674A>G           | Uncertain Significance | 3'UTR  | 1 |               | Chromatin interaction                                            | hsa-miR-4307 (seed region), hsa-miR-4251, hsa-miR-539-5p, hsa-miR-33a-3p (seed region-TSH ) |              |
| RAD50  | c.*134T>A            | Uncertain Significance | 3'UTR  | 1 |               | Chromatin interaction                                            | miR-6800-3p (TSH)                                                                           |              |
| RAD50  | c.*114A>G            | Uncertain Significance | 3'UTR  | 1 |               | Chromatin interaction                                            | hsa-miR-4326, hsa-miR-4305(TSH)                                                             |              |
| RAD50  | c.*263G>A            | Uncertain Significance | 3'UTR  | 1 |               | Chromatin interactive region                                     | hsa-miR-4638, hsa-miR-1307(TSH, seed region), hsa-miR-11400(miRDB, seed region)             | rs181991619  |
| RAD51D | c.*106G>A            | Likely Benign          | 3'UTR  | 1 | LOVD/MgeND    | Chromatin interactive region                                     | hsa-miR-4324 (miRDB), hsa-miR-589-5p, hsa-miR-146a/b-5p, hsa-miR-7153-5p (TSH)              | rs45494001   |
| STK11  | c.*261C>T            | Uncertain Significance | 3'UTR  | 1 | ClinVar Miner | TF binding region<br>Chromatin interaction                       | hsa-miR-4707-3p, hsa-miR-662                                                                | rs1054219411 |

|      |           |        |       |   |  |                              |                                                                             |             |
|------|-----------|--------|-------|---|--|------------------------------|-----------------------------------------------------------------------------|-------------|
| TP53 | c.*409C>A | Benign | 3'UTR | 1 |  | Chromatin interactive region | hsa-miR-11400, hsa-miR-4500, miR-98-5p, hsa-let-7a-5p (b, c, d, e, f, g, i) | rs191918079 |
|------|-----------|--------|-------|---|--|------------------------------|-----------------------------------------------------------------------------|-------------|

c)

| Gene   | Nt.change   | Clinical Classification | Position              | N.Patient | Database | rVarBase/ENCODE                            | HumanSpicingFinder                                                                                   | dbSNP       |
|--------|-------------|-------------------------|-----------------------|-----------|----------|--------------------------------------------|------------------------------------------------------------------------------------------------------|-------------|
| ATM    | c.7788+8G>T | Uncertain Significance  | intron 52 splice site | 1         | LOVD     |                                            | Alteration of an exonic ESE site.Potential alteration of splicing.                                   | rs112775908 |
| ATM    | c.3154-4G>A | Uncertain Significance  | intron 21 splice site | 1         | LOVD     | Chromatin interactive region               | No significant splicing motif alteration detected. This mutation has probably no impact on splicing. | rs199543313 |
| ATM    | c.2376+3A>G | Uncertain Significance  | intron 15 splice site | 1         | LOVD     | Chromatin interaction                      | No significant splicing motif alteration detected. This mutation has probably no impact on splicing. | rs758083563 |
| BRIP1  | c.1341-7A>C | Uncertain Significance  | intron 9 splice site  | 1         |          | TF binding region<br>Chromatin interaction | No significant splicing motif alteration detected. This mutation has probably no impact on splicing. |             |
| CHEK2  | c.320-5T>C  | Uncertain Significance  | Intron 2 spice site   | 10        | LOVD     | Chromatin interaction                      | No significant splicing motif alteration detected. This mutation has probably no impact on splicing. |             |
| RAD51C | c.904+5G>T  | Pathogenic              | intron 6 splice site  | 2         | LOVD     | Chromatin interaction                      | Chromatin interaction ,Alteration of the WT donor site,most probably affecting splicing.             | rs587782702 |

d)

| Gene  | Nt.change                 | Clinical Classification | Position  | N.Patient | Database      | Transcription factor                           | rVarBase/ENCODE                                                                                     | dbSNP        |
|-------|---------------------------|-------------------------|-----------|-----------|---------------|------------------------------------------------|-----------------------------------------------------------------------------------------------------|--------------|
| ATM   | c.560+19_560+22delTACT    | Uncertain Significance  | intron 6  | 1         |               |                                                | Enhancers                                                                                           | rs748598016  |
| ATM   | c.2250+22A>C              | Benign                  | Intron 14 | 1         | LOVD          | CP2 , P300,UBX, CRX, CDX1 , IRF-7A             | Chromatin interactive region                                                                        | rs3218692    |
| BRCA1 | c.81-3510_81-3505delCTTTT | Uncertain Significance  | intron 2  | 1         |               | EVI1,SRY                                       | TF binding region, Chromatin interaction,Enhancers, Flanking Active TSS Strong transcription        | rs1428246728 |
| BRCA1 | c.81-3790G>C              | Uncertain Significance  | Intron 2  | 1         | BRCA exchange | NF-IL6-2                                       | Genic enhancers, Flanking Active TSS                                                                | rs193150833  |
| BRCA1 | c.81-4100A>C              | Uncertain Significance  | Intron 2  | 1         |               |                                                | Genic enhancers, ZNF genes & repeats                                                                | rs771237151  |
| BRCA1 | c.80+247C>T               | Uncertain Significance  | Intron 2  | 1         | BRCA exchange |                                                |                                                                                                     | rs921607280  |
| BRCA1 | c.5137+51_5137+52delAT    | Uncertain Significance  | Intron 17 | 1         | BRCAexchange  | AP-2alphaA , PADS, MYOD, AP4, USF, AML1, C/EBP |                                                                                                     | rs1212800520 |
| BRCA2 | c.9256+4820C>T            | Uncertain Significance  | intron 24 | 2         | BRCA exchange |                                                | New Donor Site-Activation of an intronic cryptic donor site.Potential alteration of splicing. (HSF) | rs1196532981 |
| BRCA2 | c.9256+1464C>T            | Uncertain Significance  | Intron 24 | 1         | BRCA exchange |                                                | TF binding region, Chromatin interaction                                                            | rs945273697  |
| BRCA2 | c.9257-3610G>A            | Uncertain Significance  | intron24  | 1         | BRCAexchange  |                                                | Enhancers                                                                                           | rs17077519   |
| BRCA2 | c.681+697C>T              | Uncertain Significance  | intron 8  | 1         | BRCAexchange  |                                                | Enhancers, Genic enhancers                                                                          | rs11571632   |

|       |                |                        |           |   |                   |                                                          |                                                                                                                        |              |
|-------|----------------|------------------------|-----------|---|-------------------|----------------------------------------------------------|------------------------------------------------------------------------------------------------------------------------|--------------|
| BRCA2 | c.317-1021A>G  | Uncertain Significance | intron 3  | 2 | BRCAexchange      | CDPCR1, HNF3B, CAP (TFBIND), GR-beta, C/EBPalpha (Promo) | Activation of an intronic cryptic acceptor/donor site,Potential alteration of splicing.(HSF)Enhancers, Genic enhancers | rs11571604   |
| BRCA2 | c.8633-1274A>G | Benign                 | Intron 20 | 1 | BRCAexchange/IARC | HSF, SRY, MYB, stat4,GR-beta                             | TF binding region<br>Chromatin interactive region                                                                      | rs150600452  |
| BRCA2 | c.317-512A>T   | Uncertain Significance | Intron 3  | 1 |                   | SRY, NKX25, NRSF, C-MYC                                  | Chromatin interaction                                                                                                  |              |
| CHEK2 | c.1505-13A>G   | Uncertain Significance | Intron 13 | 1 |                   | CUTL1 , NFY ,FOXI1                                       | TF binding region                                                                                                      | rs1064793330 |
| NBN   | c.995-3C>T     | Uncertain Significance | Intron 8  | 1 |                   | TST1, OCT1,CDXA, GR-alpha                                | Splicing region - non impatto sullo splicing (Human Splicing Finder)                                                   |              |
| RAD50 | c.3475+41C>G   | Uncertain Significance | Intron 22 | 1 |                   | GR-alpha ,TFII-I,Pax-5                                   | TF binding region<br>Chromatin interaction                                                                             | rs1483042111 |
| RAD50 | c.1052-23T>C   | Benign                 | Intron 7  | 1 | LOVD              | GR-beta, HFH", CDXA, OCT1                                |                                                                                                                        | rs200246462  |
| STK11 | c.*16+42G>A    | Uncertain Significance | intron 9  | 1 |                   | TF binding region<br>CpG island<br>Chromatin interaction |                                                                                                                        | rs934771316  |

e)

| Gene | Nt.change     | Clinical Classification | Position  | N.Patient | Database      | Transcription factor                                         | rVarBase/ENCODE | dbSNP       |
|------|---------------|-------------------------|-----------|-----------|---------------|--------------------------------------------------------------|-----------------|-------------|
| ATM  | c.8850+689A>C | Uncertain Significance  | Intron 61 | 1         | ClinVar Miner | MZF1, CP2, EBF (Tfbind)                                      |                 | rs189328374 |
| ATM  | c.8850+389G>A | Uncertain Significance  | Intron 61 | 1         |               | CUTL1, P300 , FACB,YY1, PAX-4A, POU3F2, PEX14 , MYOD(Tfbind) |                 |             |

|        |                             |                        |           |   |  |                                                                                                                              |                                                                                                  |             |
|--------|-----------------------------|------------------------|-----------|---|--|------------------------------------------------------------------------------------------------------------------------------|--------------------------------------------------------------------------------------------------|-------------|
| BRIP1  | c.2379+3737A>C              | Uncertain Significance | intron 16 | 1 |  | GATA1,2,3, PAX5, XFD3, MZF1, CAP, CDPCR3HD, CMYB (Tfbind), YY1, T3R-beta1, FOXP3 (Promo), C/EBPbeta (Tf bind, Promo)         | TF binding region, Chromatin interaction                                                         | rs781102554 |
| RAD51C | c.404+63_404+71dupGTACTATCG | Uncertain Significance | Intron 2  | 1 |  | C/EBPbeta, HNF-3alpha, TFIID , GATA1, GATA2(Tfbind)                                                                          | TF binding region Chromatin interactive region                                                   | rs142735413 |
| RAD51D | c.144+558C>T                | Uncertain Significance | Intron 2  | 1 |  | GATA3, NRSF((Tfbind)                                                                                                         | TF binding region,Chromatin interactive region, Genic enhancers, Active TSS, Flanking Active TSS |             |
| TP53   | c.-29+502delC               | Uncertain Significance | intron 1  | 1 |  | MYB, Elk-1, CETS1(Tfbind)                                                                                                    | TF binding region, Chromatin interaction                                                         |             |
| TP53   | c.-2+1049C> G               | Uncertain Significance | intron 1  | 1 |  | MZF1, p300(Tfbind)                                                                                                           | TF binding region, Chromatin interaction                                                         | rs939819655 |
| TP53   | c.-29+622G>C                | Likely Benign          | intron 1  | 1 |  | NFKB, GC, AHRARNT, E2F, AHR, SP1, AP2, LYF1 (Tfbind), E2F-1 (Promo)MF3, ZF5, C/ERPbeta, LF-A1, DP-1, E2F1, E47, NF1(Lasagna) | TF binding region, CpG island, Chromatin interactive region, Enhancers, Bivalent/Poised TSS      | rs189184134 |
| TP53   | c.-29+475C>A                | Uncertain Significance | Intron 1  | 1 |  | NKX2, RAR-beta:RXR-alpha(Promo)                                                                                              | Bivalent/Poised TSS, ZNF genes & repeats, TF binding region, Chromatin interactive region        |             |

**Table S2: List of 75 non-coding variants identified in 5'UTRs (a), 3'UTRs (b), splice regions(c), intronic regions(d), and the incidental findings (e).** The table reports the nucleotide change for each variant, their clinical classification (P = Pathogenic, LP = Likely-pathogenic, VUS = Variant of Unknown clinical Significance, LB = Likely-benign), their frequency in patients analyzed, the chromatin states of surrounding regions (rVarBase/ENCODE), any registration in databases and the variant dbSNP code. The predictions on putative TF binding sites were evaluated by *Promo*, *TF Bind* and *Lasagna* software **(a, d, e)**, the presence of consensus sequences for miRNA binding sites was analyzed by *TargetScanHuman* and *miRDB* **(b)** and the investigation on potential splice sites was performed by *Human Splicing Finder* **(c)**.

a)

| Genomic regions             | Genomic localization           | Length (bases) |
|-----------------------------|--------------------------------|----------------|
| BRCA1 promoter              | chr17: 41,277,500 – 41,278,500 | 1000           |
| BRCA1 5'UTR (exon1A)        | chr17: 41,277,287 – 41,277,500 | 223            |
| BRCA1 5'UTR (exon 1B)       | chr17: 41,277,340 – 41,277,197 | 145            |
| BRCA1 5'UTR (exon 2 to ATG) | chr17: 41,276,110 – 41,276,133 | 22             |
| BRCA1 Intron 2 (region 1)   | chr17: 41,271,250 - 41,272,100 | 850            |
| BRCA1 Intron 2 (region 2)   | chr17: 41,275,493 - 41,276,019 | 526            |
| BRCA1 intron 12 (region 1)  | chr17: 41,237,500 – 41,237,850 | 350            |
| BRCA1 intron 12 (region 2)  | chr17: 41,236,600 – 41,236,960 | 360            |
| BRCA1 Intron 13             | chr17: 41,231,460 - 41,232,155 | 695            |
| BRCA1 intron 16             | chr17: 41,220,900 – 41,221,250 | 350            |
| BRCA1 3'UTR (exon 24)       | chr17: 41,196,311 – 41,197,698 | 1387           |
| BRCA2 promoter              | chr13: 32,888,616 – 32,889,616 | 1000           |
| BRCA2 5'UTR (exon 1)        | chr13: 32,889,616 – 32,889,805 | 189            |
| BRCA2 5'UTR (exon 2 to ATG) | chr13: 32,890,558 – 32,890,600 | 42             |
| BRCA2 Intron 3              | chr13: 32,898,060 - 32,898,621 | 561            |
| BRCA2 Intron 8              | chr13: 32,904,481 - 32,905,003 | 522            |
| BRCA2 Intron 24 (region 1)  | chr13: 32,955,507 - 32,956,161 | 654            |
| BRCA2 Intron 24 (region 2)  | chr13: 32,958,773 - 32,959,472 | 699            |
| BRCA2 Intron 24 (region 3)  | chr13: 32,964,590 - 32,965,788 | 1198           |
| BRCA2 3'UTR                 | chr13: 32,972,904 – 32,973,809 | 905            |

b)

| Genomic regions              | Genomic localization                                             | Length (bases) |
|------------------------------|------------------------------------------------------------------|----------------|
| PALB2 5'UTR<br>PALB2 3'UTR   | chr16: 23,652,480 -23,652,715<br>chr16: 23,652,491 -23,652,782   | 235<br>291     |
| PTEN 5'UTR<br>PTEN 3'UTR     | chr10: 89,622,882 -89,624,235<br>chr10: 89,725,231 -89,731,706   | 1354<br>6475   |
| TP53 5'UTR<br>TP53 3'UTR     | chr17: 7,590,696 -7,590,860<br>chr17: 7,571,723 -7,572,936       | 164<br>1213    |
| RAD51C 5'UTR<br>RAD51C 3'UTR | chr17: 56,769,568-56,770,006<br>chr17: 56,811,586-56,811,710     | 438<br>124     |
| RAD51D 5'UTR<br>RAD51D 3'UTR | chr17: 33,446,642 -33,448,545<br>chr17: 33,427 ,692 -33,427,981  | 1903<br>289    |
| ATM 5'UTR<br>ATM 3'UTR       | chr11:108,093,562 -108,098,352<br>chr11:108,236,234 -108,239,837 | 4790<br>3603   |
| CDH1 5'UTR<br>CDH1 3'UTR     | chr16: 68,771,129 -68,771,320<br>chr16: 68,867,415 -68,869,491   | 191<br>2076    |
| CHEK2 5'UTR<br>CHEK2 3'UTR   | chr22: 29,137,758-29,137,828<br>chr22: 29,083,750-29,083,887     | 70<br>137      |
| STK11 5'UTR<br>STK11 3'UTR   | chr19: 1,205,743 -1,206,918<br>chr19: 1,227,566 -1,228,450       | 1175<br>884    |
| BRIP1 5'UTR<br>BRIP1 3'UTR   | chr17:59,940,652 -59,940,898<br>chr17:59,756,503 -59,760,684     | 246<br>4181    |
| RAD50 5'UTR<br>RAD50 3'UTR   | chr5: 131,892,637 -131,893,020<br>chr5: 131,978,078 -131,979,770 | 383<br>1692    |
| NBN 5'UTR<br>NBN 3'UTR       | chr8: 90,996,794 -90,996,951<br>chr8: 90,945,564 -90,947,864     | 157<br>2300    |

**Table S3: Genomic coordinates of the regulatory regions covered with the probe panel a) of the 5'UTR, the 3'UTR and of the intronic regions of the *BRCA1/2*. b) of the 5'UTR and the 3'UTR of the 12 genes analyzed and the relative length covered in base pairs.**
